1           **Title: N6-Adenosine methylation regulates the translation of insulin mRNA**

2

3                           **Authors:** Daniel Wilinski<sup>1</sup> and Monica Dus<sup>1\*</sup>

4   **Affiliations:**

5   <sup>1</sup> Department of Molecular, Cellular, and Developmental Biology, The University of Michigan;  
6   Ann Arbor, MI 48109

7           \*Corresponding author. Email: [mdus@umich.edu](mailto:mdus@umich.edu)

8

9   **Abstract:**

10   Relatively little is known about the first step of insulin synthesis: the translation of the mRNA.  
11   Here we show that the translation of *D. melanogaster insulin 2* mRNA (*dilp2*) is controlled by  
12   methylation of N6-adenosine (m<sup>6</sup>A) in the 3' UTR. Mutations in the m<sup>6</sup>A writer *Mettl3* and  
13   methylated-residues in the *dilp2* 3'UTR decreased the levels of *dilp2* mRNA associated with the  
14   polysomes, and the total amount of *dilp2* protein produced. This resulted in aberrant energy  
15   homeostasis and diabetic-like phenotypes, consistent with the specific function of *dilp2* in adult  
16   metabolism. Conserved m<sup>6</sup>A signatures were also identified in the 3' UTRs of vertebrate insulin  
17   mRNAs. These data identify m<sup>6</sup>A as a key regulator of insulin protein synthesis and energy  
18   homeostasis in metazoans and demonstrate an essential role for m<sup>6</sup>A in translation, with  
19   important implications for diabetes and metabolic disease.

20

21   **One-Sentence Summary:** The most abundant modification in eukaryotic mRNAs controls the  
22   synthesis of insulin protein in *D. melanogaster*.

23

24

25 **Main Text:**

26 m<sup>6</sup>A is an abundant internal modification of eukaryotic mRNAs involved in regulating  
27 mRNA stability, turnover, and translation (1). As such, it plays an important role in many biological  
28 processes, including differentiation, development, and cancer (2). Recent studies have also  
29 implicated the m<sup>6</sup>A pathway in energy homeostasis, particularly in the pathogenesis of Type 2  
30 Diabetes (T2D), a chronic disease characterized by the inability to regulate blood glucose via the  
31 insulin hormone. Genetic depletion of m<sup>6</sup>A levels in mammalian insulin  $\beta$ -cells resulted in higher  
32 circulating glucose and diabetic phenotypes (3, 4) as well as impaired insulin-cell mass and  
33 maturation *in vitro* (4). Reduced m<sup>6</sup>A levels were also observed in the pancreatic  $\beta$ -cells of  
34 humans with T2D (5). These observations suggest that m<sup>6</sup>A plays a role in energy homeostasis,  
35 especially glucose regulation and T2D. However, the specific mechanisms through which this  
36 pathway controls energy balance remain unresolved. Further, translational control is thought to  
37 be a critical step in the production of insulin, but the mechanism remains uncharacterized (6, 7).  
38 Here we took advantage of the ancestral conservation of the m<sup>6</sup>A (8) and insulin systems in  
39 invertebrates (9) to identify the molecular mechanisms through which m<sup>6</sup>A regulates glucose  
40 homeostasis and its contributions to diabetes and metabolic disease.

41 In *D. melanogaster*, 14 neuroendocrine cells located in the *pars intercerebralis* (Fig. 1A)  
42 regulate hemolymph glycemia and energy homeostasis by producing three insulin-like hormones  
43 (10). While these insulin-like hormones have redundant roles in development, the *Drosophila*  
44 insulin-like 2 (*dilp2*) peptide is necessary and sufficient to regulate hemolymph glycemia and fat  
45 levels in adult flies; *dilp2* also has the highest homology to human insulin, while other *dilps* are  
46 related to the Relaxin family of hormones (9, 11–13). Mutations in *dilp2* and ablation of the insulin-  
47 producing cells result in higher levels of circulating sugar and reduced metabolic function,  
48 phenotypes that can be rescued by injection of human insulin (9–12). Networks of transcripts  
49 involved in fly metabolism are methylated (14, 15). The accessible location of these cells, together  
50 with the genetic and metabolic analysis tools available, makes the fly a uniquely suited model to  
51 investigate the *in vivo* function of the m<sup>6</sup>A pathway in glucose and energy homeostasis.

52 To tackle this question, we first measured the levels of circulating glucose and of body  
53 triglycerides in flies mutant for the conserved methyltransferase writer enzyme *Mettl3* (1).  
54 Compared to control flies, *Mettl3*<sup>-/-</sup> mutants showed higher fasted circulating sugar levels (Fig.  
55 1B), as well as increased triglycerides, as previously reported for *dilp2* mutants (12) (Fig. 1C).  
56 Cell-specific knockdown of *Mettl3* in the insulin-producing cells using the *Dilp2*-*GAL4* transgene  
57 (50% efficiency, Fig S1A) phenocopied the effects of *Mettl3*<sup>-/-</sup> mutants and resulted in higher

58 circulating glucose and triglycerides (Fig. 1D, E). These phenotypes did not arise from  
59 developmental alterations in the *dilp2*<sup>+</sup> cells because knocking down *Mettl3* only in post-eclosion,  
60 adult *dilp2>Mettl3<sup>RNAi</sup>; tubulin-GAL80<sup>ts</sup>* flies showed the same energy homeostasis phenotypes as  
61 *dilp2>Mettl3<sup>RNAi</sup>* animals (Fig. S1B). Importantly, expression of wild-type *Mettl3* only in the insulin  
62 cells in an otherwise *Mettl3<sup>-/-</sup>* mutant background rescued the energy balance defects, indicating  
63 that the phenotype arises from these cells (Fig. 1F). Thus, *Mettl3* acts in the insulin cells to  
64 regulate energy balance; this is similar to the phenotypes of m<sup>6</sup>A writers mutants observed in mice  
65 (3).

66 Since the physiological effects of *Mettl3* depletion are reminiscent of those caused by  
67 mutations in the *dilp2* gene –but not other insulin-like peptides (12)– and murine data implicated  
68 potential changes in insulin levels (3, 5), we asked if *Mettl3* affected the amount of this hormone.  
69 We found no changes in the abundance of *dilp2* mRNA between *Mettl3<sup>-/-</sup>* and control flies (Fig.  
70 2A); the amount of other insulin-like mRNAs produced in these cells, *dilp3* and *dilp5*, were  
71 unchanged (Fig. S2A, B). In contrast, we observed a marked reduction in *dilp2* protein in the  
72 insulin-producing cells of *Mettl3<sup>-/-</sup>* mutant flies (Fig. 2B, C); no changes in the number and  
73 morphology of the insulin cells, or the amounts of the closely related *dilp3* hormone were observed  
74 (Fig. S2C, D, E). m<sup>6</sup>A regulates both RNA stability/turnover and translation in a context-dependent  
75 way (2). The observed decrease in *dilp2* protein levels without accompanying changes in mRNA  
76 abundance suggests that m<sup>6</sup>A may contribute to the translation of the *dilp2* transcript. This may  
77 also explain why we do not observe a concomitant transcriptional response from the other *dilps*  
78 (Fig. S2A, B) (16). To test the hypothesis that the m<sup>6</sup>A pathway affects the translational status of  
79 the *dilp2* mRNA, we fractionated polysomes from control and *Mettl3<sup>-/-</sup>* mutants and measured the  
80 amount of *dilp2* transcript associated with each fraction (Fig. 2D, E). In control flies, 89% of the  
81 *dilp2* mRNAs cosedimented with polysome fractions, suggesting active and efficient translation  
82 (Fig. 2F, gray). Strikingly, this pattern was reversed in *Mettl3<sup>-/-</sup>* flies, where only 19% of *dilp2*  
83 mRNA was found in the heavier fractions; instead, 80% of this mRNA was associated with early  
84 fractions, representing ribosomal individual subunits and monosomes (Fig. 2F, green). This  
85 suggests that m<sup>6</sup>A is required for loading the *dilp2* mRNA onto polysomes and therefore proper  
86 translation of the *dilp2* mRNA into protein.

87

88 To characterize the molecular causes of this phenotype, we used fly heads to perform  
89 m<sup>6</sup>A ultraviolet light-induced Cross-linking and Immunoprecipitation (miCLIP (17)), a technique  
90 that identifies transcripts marked by m<sup>6</sup>A. The three biological replicates showed good

91 reproducibility with a mean correlation of 0.95 (Fig. S3A) and identified 4,506 m<sup>6</sup>A peaks  
92 corresponding to 1,828 genes involved in brain processes including development and plasticity  
93 (Data S1 and Fig. S3B). Forty-four percent (2009) of our peaks overlap with previous CLIP data  
94 from fly heads including *Atpa* (18) (Fig. S3C). Metagene analysis revealed that most m<sup>6</sup>A peaks  
95 mark the 5' untranslated region (UTR) of transcripts, while a much smaller portion is present in  
96 the 3' UTR, particularly near the stop codon (Fig. 3A); this is consistent with previous miCLIP  
97 studies in flies (18, 19). We also observed an enriched fly RRAC (R=purine) sequence motif at C-  
98 to-T crosslinking-induced mutation sites (CIMS) which represent m<sup>6</sup>A sites from CLIP/RIP data  
99 (14, 17–19) (Fig. 3B, Data S1).

100         Since we observed lower translation of the *dilp2* mRNA in *Mettl3*<sup>-/-</sup> mutants, we asked if  
101 this transcript was methylated. Indeed, an m<sup>6</sup>A peak was present in the 3' UTR of *dilp2*, shortly  
102 after the stop codon (Fig. 3C); none of the mRNAs encoding for other insulin-like peptides  
103 expressed in the insulin-producing cells, such as *dilp3* or *dilp5*, showed any signatures of  
104 methylation (Fig S3D, E). Thus, the *dilp2* mRNA is methylated *in vivo*. To better characterize the  
105 location of the modified A we turned to direct-RNA sequencing (Oxford Nanopore) where modified  
106 bases can be detected as changes in normalized current through the nanopore (20–22). We first  
107 *in vitro* transcribed RNA oligomers containing only one methylated or unmethylated A, sequenced  
108 them on the Nanopore, and then used the EpiNano algorithm to assess deviations in base-calling  
109 between these two identical oligomers (Fig. S4A, Table S1) (21). Direct-RNA sequencing of these  
110 RNAs revealed a shift in the raw current near the methylated bases (Fig. S4B) which results in a  
111 significant difference in base-call “errors” (Fig. S4C). Thus, we can detect N6-methylation as a  
112 deviation in base calling at or near to the methylated A via direct-RNA sequencing. To define if  
113 the native *dilp2* mRNA was methylated *in vivo*, we enriched for insulin-cell-specific mRNAs by  
114 expressing the FLAG-tagged Ribosomal Protein 3 *UAS-RPL3::FLAG* transgene with *Dilp2-GAL4*.  
115 We then direct-RNA sequenced the purified poly(A)+ RNA and defined deviations between base  
116 calls of *in vitro* transcribed and native RNA (21). This experiment revealed a significant difference  
117 in the 3' UTR between the *in vitro* transcribed and native *dilp2* RNAs (Fig. 3D, E). In particular,  
118 three bases in the 3'UTR (Positions G519, C614, C664) had significantly higher base-call  
119 deviations in the native RNA compared to the *in vitro* transcribed *dilp2* RNA. Position G519  
120 corresponds to the CLIP peak and positions C614 and C664 are part of AC dinucleotides (Table  
121 S2). Together with the results from miCLIP, these data show that at least three specific ACs in  
122 the 3'UTR of the *dilp2* mRNA are methylated *in vivo* in the *D. melanogaster* insulin-producing  
123 cells.

124 To investigate whether N-6 RNA methylation of the *dilp2* 3' UTR directly affects its  
125 translation, we generated flies that lacked "methylatable" A's in the 3' UTR (*dilp2*<sup>m6A-/-</sup>). Using  
126 the miCLIP and Nanopore analyses, we selected 11 "AC" nucleotides and mutated these into  
127 "UC" using CRISPR (Fig. S5A). These included the AC near G519 and C614 with the strongest  
128 methylation signals (Fig. 3C, E); A663 could not be removed for technical reasons. Clone 364-4  
129 was selected for further study after confirming all the A>U mutations by Sanger sequencing  
130 (Fig. S5B). Sucrose density polysome gradients showed that compared to control flies, where  
131 92% of the *dilp2* mRNAs were in heavier fractions, representing the polysomes, 69% of *dilp2*  
132 mRNAs from *dilp2*<sup>m6A-/-</sup> flies were associated with early fractions (Fig 4A, S6A, B). Consistent  
133 with this, quantification of the total levels of dilp2 protein with anti-dilp2 specific antibodies in the  
134 insulin cells revealed a 20 % decrease in *dilp2*<sup>m6A-/-</sup> flies compared to controls (Fig. 4B, C).  
135 Strikingly, we found that *dilp2*<sup>m6A-/-</sup> mutants recapitulated the deficits in glucose and energy  
136 homeostasis observed in *Mettl3* mutant flies, with an increase in fasting glucose levels and in  
137 triglycerides (Fig 4 D, E). Together, these findings suggest that, in flies, m<sup>6</sup>A modification of the  
138 *dilp2* mRNA controls the effective translation, and thus synthesis, of the insulin protein.

139 Elements in the 3' UTR of mammalian insulin are thought to play an important role in its  
140 translation (6, 7). Given the conservation of the insulin and m<sup>6</sup>A pathways in metazoa, we asked  
141 if signatures of m<sup>6</sup>A were also present in vertebrate insulin mRNAs. To do this, we obtained  
142 polyA-selected mRNAs from Atlantic salmon pancreatic tissue (*Salmo salar*) and mouse islet  
143 cells and analyzed them by direct-RNA sequencing. We analyzed 5,000 and 10,000 reads that  
144 mapped to the INS and INS2 insulin genes from salmon and mouse, respectively. This analysis  
145 revealed one putative m<sup>6</sup>A site in the 3'UTR of salmon insulin (Fig. 4F, Table S2, C464) and two  
146 putative m<sup>6</sup>A sites in INS2 3' UTR (Fig. 4G, Table S2, A531, and C581). This suggests that  
147 regulation of insulin translation by m<sup>6</sup>A may be conserved.

148 Taken together, our observations support a general model where methylation of  
149 adenosines in the 3'UTR of the *dilp2* mRNA enhances translation by promoting the association  
150 of this mRNA with polysomes which is consistent with a possible defect in translation initiation  
151 (23). In contrast, m<sup>6</sup>A in the 5' UTR has been linked to non-canonical translational control (24).  
152 Although we cannot exclude that this mechanism also controls other aspects of *dilp2* mRNA,  
153 our polysome profiling data links m<sup>6</sup>A marks in the *dilp2* mRNA with translational initiation. In the  
154 absence of this epitranscriptomic signal, less insulin is produced, compromising the animal's  
155 ability to regulate sugar and energy homeostasis. Interestingly, this mark only controls the  
156 translation of the *dilp2* mRNA and not the closely related *dilp3* and *dilp5* genes, consistent with

157 the fact that the deposition of the signal is specific (25). Further, it suggests that previously  
158 observed transcriptional compensations among different insulin-like peptides in *D. melanogaster*  
159 are tied to mRNA abundance, not protein levels (16).

160 Based on our discovery that adenosines in the 3'UTR of mouse and salmon insulin  
161 mRNAs are marked with m<sup>6</sup>A, and on previous data showing that Mettl3 and Mettl14 are  
162 involved in glucose homeostasis, we anticipate that regulation of insulin translation and energy  
163 homeostasis by this RNA modification will be a conserved mechanism in vertebrates. Since m<sup>6</sup>A  
164 has been linked to cellular metabolism and signaling, this mode of regulation could provide a  
165 mechanism to time insulin translation with the presence of specific physiological signals, as well  
166 as to prepare for its fast production. This is consistent with findings that elements in the 3'UTR  
167 of mammalian insulin are important for its regulated production (6, 7) and that altered levels of  
168 m<sup>6</sup>A are found in the islets of people with T2D (5). However, it is still unclear if the m<sup>6</sup>A mark is  
169 dynamic and could really be used to switch translation. However, rather than toggling translation  
170 on and off, m<sup>6</sup>A could promote protein synthesis by direct cellular compartmentalization via  
171 phase separation (1). This work also provides direct evidence for the hypothesis that m<sup>6</sup>A in the  
172 3' UTR plays an essential and robust role in translation, although the mechanisms remain to be  
173 defined (1). Besides its relevance to the study of insulin and physiology, the methylation of *dilp2*  
174 mRNA could be a viable model to address these and future questions about the biology of m<sup>6</sup>A.  
175 In summary, our work has uncovered a new fundamental step in the biosynthesis of insulin and  
176 the biology of m<sup>6</sup>A, with critical implications for understanding RNA control (or translational  
177 control) mechanisms in the regulation of energy homeostasis and the etiology of metabolic  
178 disease.

## 179 **References and Notes:**

- 180 1. S. Zaccara, R. J. Ries, S. R. Jaffrey, Reading, writing and erasing mRNA methylation. *Nat.*  
181 *Rev. Mol. Cell Biol.* **20**, 608–624 (2019).
- 182 2. P. C. He, C. He, m<sup>6</sup>A RNA methylation: from mechanisms to therapeutic potential. *EMBO*  
183 *J.* **40**, e105977 (2021).
- 184 3. L. Men, J. Sun, G. Luo, D. Ren, Acute Deletion of METTL14 in  $\beta$ -Cells of Adult Mice  
185 Results in Glucose Intolerance. *Endocrinology.* **160**, 2388–2394 (2019).
- 186 4. J. Liu, G. Luo, J. Sun, L. Men, H. Ye, C. He, D. Ren, METTL14 is essential for  $\beta$ -cell  
187 survival and insulin secretion. *Biochim. Biophys. Acta Mol. Basis Dis.* **1865**, 2138–2148  
188 (2019).
- 189 5. D. F. De Jesus, Z. Zhang, S. Kahraman, N. K. Brown, M. Chen, J. Hu, M. K. Gupta, C. He,  
190 R. N. Kulkarni, m<sup>6</sup>A mRNA Methylation Regulates Human  $\beta$ -Cell Biology in Physiological

- 191 States and in Type 2 Diabetes. *Nat Metab.* **1**, 765–774 (2019).
- 192 6. H. Jahr, D. Schröder, B. Ziegler, M. Ziegler, H. Zühlke, Transcriptional and translational  
193 control of glucose-stimulated (pro)insulin biosynthesis. *Eur. J. Biochem.* **110**, 499–505  
194 (1980).
- 195 7. M. G. Magro, M. Solimena, Regulation of  $\beta$ -cell function by RNA-binding proteins.  
196 *Molecular Metabolism.* **2**, 348–355 (2013).
- 197 8. T. Lence, M. Soller, J.-Y. Roignant, A fly view on the roles and mechanisms of the m6A  
198 mRNA modification and its players. *RNA Biol.* **14**, 1232–1240 (2017).
- 199 9. R. Das, L. L. Dobens, Conservation of gene and tissue networks regulating insulin  
200 signalling in flies and vertebrates. *Biochem. Soc. Trans.* **43**, 1057–1062 (2015).
- 201 10. E. J. Rulifson, S. K. Kim, R. Nusse, Ablation of insulin-producing neurons in flies: growth  
202 and diabetic phenotypes. *Science.* **296**, 1118–1120 (2002).
- 203 11. K. Kannan, Y.-W. C. Fridell, Functional implications of Drosophila insulin-like peptides in  
204 metabolism, aging, and dietary restriction. *Front. Physiol.* **4**, 288 (2013).
- 205 12. U. V. Semaniuk, D. V. Gospodaryov, K. M. Feden'ko, I. S. Yurkevych, A. M. Vaiserman, K.  
206 B. Storey, S. J. Simpson, O. Lushchak, Insulin-Like Peptides Regulate Feeding Preference  
207 and Metabolism in Drosophila. *Front. Physiol.* **9**, 1083 (2018).
- 208 13. W. Brogiolo, H. Stocker, T. Ikeya, F. Rintelen, R. Fernandez, E. Hafen, An evolutionarily  
209 conserved function of the Drosophila insulin receptor and insulin-like peptides in growth  
210 control. *Curr. Biol.* **11**, 213–221 (2001).
- 211 14. T. Lence, J. Akhtar, M. Bayer, K. Schmid, L. Spindler, C. H. Ho, N. Kreim, M. A. Andrade-  
212 Navarro, B. Poeck, M. Helm, J.-Y. Roignant, m6A modulates neuronal functions and sex  
213 determination in Drosophila. *Nature.* **540**, 242–247 (2016).
- 214 15. I. U. Haussmann, Z. Bodi, E. Sanchez-Moran, N. P. Mongan, N. Archer, R. G. Fray, M.  
215 Soller, m6A potentiates Sxl alternative pre-mRNA splicing for robust Drosophila sex  
216 determination. *Nature.* **540**, 301–304 (2016).
- 217 16. S. Broughton, N. Alic, C. Slack, T. Bass, T. Ikeya, G. Vinti, A. M. Tommasi, Y. Driege, E.  
218 Hafen, L. Partridge, Reduction of DILP2 in Drosophila triages a metabolic phenotype from  
219 lifespan revealing redundancy and compensation among DILPs. *PLoS One.* **3**, e3721  
220 (2008).
- 221 17. A. V. Grozhik, B. Linder, A. O. Olarerin-George, S. R. Jaffrey, Mapping m6A at Individual-  
222 Nucleotide Resolution Using Crosslinking and Immunoprecipitation (miCLIP). *Methods Mol.*  
223 *Biol.* **1562**, 55–78 (2017).
- 224 18. L. Kan, S. Ott, B. Joseph, E. S. Park, W. Dai, R. E. Kleiner, A. Claridge-Chang, E. C. Lai, A  
225 neural m6A/Ythdf pathway is required for learning and memory in Drosophila. *Nat.*  
226 *Commun.* **12**, 1458 (2021).
- 227 19. L. Kan, A. V. Grozhik, J. Vedanayagam, D. P. Patil, N. Pang, K.-S. Lim, Y.-C. Huang, B.  
228 Joseph, C.-J. Lin, V. Despic, J. Guo, D. Yan, S. Kondo, W.-M. Deng, P. C. Dedon, S. R.  
229 Jaffrey, E. C. Lai, The m6A pathway facilitates sex determination in Drosophila. *Nat.*

- 230 *Commun.* **8**, 15737 (2017).
- 231 20. D. R. Garalde, E. A. Snell, D. Jachimowicz, B. Sipos, J. H. Lloyd, M. Bruce, N. Pantic, T.  
232 Admassu, P. James, A. Warland, M. Jordan, J. Ciccone, S. Serra, J. Keenan, S. Martin, L.  
233 McNeill, E. J. Wallace, L. Jayasinghe, C. Wright, J. Blasco, S. Young, D. Brocklebank, S.  
234 Juul, J. Clarke, A. J. Heron, D. J. Turner, Highly parallel direct RNA sequencing on an array  
235 of nanopores. *Nat. Methods.* **15**, 201–206 (2018).
- 236 21. H. Liu, O. Begik, M. C. Lucas, J. M. Ramirez, C. E. Mason, D. Wiener, S. Schwartz, J. S.  
237 Mattick, M. A. Smith, E. M. Novoa, Accurate detection of m6A RNA modifications in native  
238 RNA sequences. *Nat. Commun.* **10**, 4079 (2019).
- 239 22. M. T. Parker, K. Knop, A. V. Sherwood, N. J. Schurch, K. Mackinnon, P. D. Gould, A. J.  
240 Hall, G. J. Barton, G. G. Simpson, Nanopore direct RNA sequencing maps the complexity  
241 of Arabidopsis mRNA processing and m6A modification. *Elife.* **9** (2020),  
242 doi:10.7554/eLife.49658.
- 243 23. X. Wang, B. S. Zhao, I. A. Roundtree, Z. Lu, D. Han, H. Ma, X. Weng, K. Chen, H. Shi, C.  
244 He, N(6)-methyladenosine Modulates Messenger RNA Translation Efficiency. *Cell.* **161**,  
245 1388–1399 (2015).
- 246 24. K. D. Meyer, D. P. Patil, J. Zhou, A. Zinoviev, M. A. Skabkin, O. Elemento, T. V. Pestova,  
247 S.-B. Qian, S. R. Jaffrey, 5' UTR m(6)A Promotes Cap-Independent Translation. *Cell.* **163**,  
248 999–1010 (2015).
- 249 25. K. D. Meyer, m6A-mediated translation regulation. *Biochim. Biophys. Acta Gene Regul.*  
250 *Mech.* **1862**, 301–309 (2019).
- 251 26. B. J. Zarnegar, R. A. Flynn, Y. Shen, B. T. Do, H. Y. Chang, P. A. Khavari, irCLIP platform  
252 for efficient characterization of protein-RNA interactions. *Nat. Methods.* **13**, 489–492  
253 (2016).
- 254 27. A. Dobin, C. A. Davis, F. Schlesinger, J. Drenkow, C. Zaleski, S. Jha, P. Batut, M.  
255 Chaisson, T. R. Gingeras, STAR: ultrafast universal RNA-seq aligner. *Bioinformatics.* **29**,  
256 15–21 (2013).
- 257 28. P. J. Uren, E. Bahrami-Samani, S. C. Burns, M. Qiao, F. V. Karginov, E. Hodges, G. J.  
258 Hannon, J. R. Sanford, L. O. F. Penalva, A. D. Smith, Site identification in high-throughput  
259 RNA-protein interaction data. *Bioinformatics.* **28**, 3013–3020 (2012).
- 260 29. A. O. Olarerin-George, S. R. Jaffrey, MetaPlotR: a Perl/R pipeline for plotting metagenes of  
261 nucleotide modifications and other transcriptomic sites. *Bioinformatics.* **33**, 1563–1564  
262 (2017).
- 263 30. G. E. Crooks, G. Hon, J.-M. Chandonia, S. E. Brenner, WebLogo: a sequence logo  
264 generator. *Genome Res.* **14**, 1188–1190 (2004).
- 265 31. G. Yu, L.-G. Wang, Y. Han, Q.-Y. He, clusterProfiler: an R package for comparing biological  
266 themes among gene clusters. *OMICS.* **16**, 284–287 (2012).
- 267 32. M. Carlson, *org.Dm.eg.db* (Bioconductor, 2017;  
268 <https://bioconductor.org/packages/org.Dm.eg.db>).



- 269 33. P. Essers, L. S. Tain, T. Nespital, J. Goncalves, J. Froehlich, L. Partridge, Reduced  
270 insulin/insulin-like growth factor signaling decreases translation in *Drosophila* and mice. *Sci.*  
271 *Rep.* **6**, 30290 (2016).
- 272 34. D. Wilinski, J. Winzeler, W. Duren, J. L. Persons, K. J. Holme, J. Mosquera, M. Khabiri, J.  
273 M. Kinchen, P. L. Freddolino, A. Karnovsky, M. Dus, Rapid metabolic shifts occur during  
274 the transition between hunger and satiety in *Drosophila melanogaster*. *Nat. Commun.* **10**,  
275 4052 (2019).
- 276 35. C. E. May, A. Vaziri, Y. Q. Lin, O. Grushko, M. Khabiri, Q.-P. Wang, K. J. Holme, S. D.  
277 Pletcher, P. L. Freddolino, G. G. Neely, M. Dus, High Dietary Sugar Reshapes Sweet Taste  
278 to Promote Feeding Behavior in *Drosophila melanogaster*. *Cell Rep.* **27**, 1675–1685.e7  
279 (2019).
- 280 36. C. Géminard, E. J. Rulifson, P. Léopold, Remote control of insulin secretion by fat cells in  
281 *Drosophila*. *Cell Metab.* **10**, 199–207 (2009).
- 282 37. K. Buhler, J. Clements, M. Winant, L. Bolckmans, V. Vulsteke, P. Callaerts, Growth control  
283 through regulation of insulin signalling by nutrition-activated steroid hormone in *Drosophila*.  
284 *Development.* **145** (2018), doi:10.1242/dev.165654.
- 285 38. J. Schindelin, I. Arganda-Carreras, E. Frise, V. Kaynig, M. Longair, T. Pietzsch, S.  
286 Preibisch, C. Rueden, S. Saalfeld, B. Schmid, J.-Y. Tinevez, D. J. White, V. Hartenstein, K.  
287 Eliceiri, P. Tomancak, A. Cardona, Fiji: an open-source platform for biological-image  
288 analysis. *Nat. Methods.* **9**, 676–682 (2012).
- 289 39. H. Li, Minimap2: pairwise alignment for nucleotide sequences. *Bioinformatics.* **34**, 3094–  
290 3100 (2018).
- 291 40. M. Stoiber, J. Quick, R. Egan, J. E. Lee, S. Celniker, R. K. Neely, N. Loman, L. A.  
292 Pennacchio, J. Brown, De novo identification of DNA Modifications Enabled by Genome-  
293 Guided Nanopore Signal Processing, , doi:10.1101/094672.
- 294 41. J. M. Tennessen, W. E. Barry, J. Cox, C. S. Thummel, Methods for studying metabolism in  
295 *Drosophila*. *Methods.* **68**, 105–115 (2014).

296

## 297 **Acknowledgments:**

298 **General:** We thank Pierre Léopold for the kind gift of Dilp2 antibody, Patrick Callaerts for the gift  
299 of Dilp3 antibody, Randy Seeley for mice and Corentin Cras-Méneur for isolating Mouse islets,  
300 Jean-Yves Roignant for *Mettl3* mutant flies, and the Blooming *Drosophila* Stock center for other  
301 flies used in this study. Salmon tissue was a gift from Brian Peterson (USDA); we thank Cunmin  
302 Duan for advice. We are grateful to Peter Todd and Shannon Miller for training and for the use  
303 of their polysome fractionation equipment and training; Christopher Lapointe for thoughtful  
304 comments on the manuscript. We also thank Julia Kuhl for designing some of the graphics in  
305 this manuscript.

306

307 **Funding:**

308 NIH R00 DK-97141 (MD)

309 NIH 1DP2DK-113750 (MD)

310 Rita Allen Foundation (MD)

311 NSF CAREER 1941822 (MD)

312 NIH T32 DA007268 (DW)

313 NIH P30 DK089503 (MD and DW)

314

315 **Author contributions:**

316 Conceptualization: DW and MD

317 Methodology: DW

318 Investigation: DW and MD

319 Visualization: DW and MD

320 Funding acquisition: MD

321 Project administration: MD

322 Supervision: MD

323 Writing – DW and MD

324 Writing – review & editing: DW and MD

325

326 **Competing interests:** Authors declare that they have no competing interests.

327 **Data and materials availability:** All data are available in the main text or supplementary  
328 materials. RNA-sequencing reads were deposited in Gene Expression Omnibus accession  
329 number GSE207547. (The following secure token has been created to allow review of record  
330 GSE207547 while it remains in private status: cfkreeumnfajzkn) *dllp2* 3'UTR mutants are  
331 available upon request.

332

## 333 **Supplementary Materials**

334

## 335 **Materials and Methods**

### 336 **Fly lines and husbandry**

337 All flies were maintained at 25 °C in a humidity-controlled incubator with a 12:12 hr light/dark  
338 cycle. Animals were fed Bloomington Food B (cornmeal-glucose) ad-lib and provided fresh food  
339 every other day. For all experiments, flies were collected under CO<sub>2</sub> anesthesia, 2–4 days  
340 following eclosion, and housed in groups of 20–30 to age until testing (6-10 days old). The  
341 stocks used are listed in Table S3. Depending on the genetic background of the mutations, we  
342 used *w<sup>1118</sup>* (Rainbow Transgenic Flies, Camarillo, CA) or *w<sup>1118</sup> Canton-S* flies (Benzer lab,  
343 Caltech) as controls.

### 344 **RNA extraction**

345 Standard methods to isolate total RNA were used for quantitative polymerase chain reaction  
346 (qPCR), crosslinking and immunoprecipitation (CLIP), and direct-RNA sequencing. Briefly,  
347 heads from 10 to 20 flies were dissected and immediately frozen on dry ice for qPCR. 800 fly  
348 heads were isolated from bodies by sieving for CLIP and direct RNA-sequencing. All samples  
349 were stored at -80 °C until extraction. Phenol-chloroform (Invitrogen, 15596018) and RIPA  
350 buffer (150 mM NaCl, 1% Nonidet P-40, 0.5% Sodium deoxycholate, 0.1% SDS, 50mM Tris pH  
351 7.5) were added to frozen samples and homogenized by bead bashing (Bead Ruptor, 19-040E).  
352 Phenol-chloroform extracted RNA was precipitated by isopropanol with GlycoBlue coprecipitant  
353 (Invitrogen AM9515). RNA was stored at -80 °C until further processing.

### 354 **CLIP**

#### 355 *Library preparation*

356 We adapted miCLIP (17) to use infrared-dye-conjugated irCLIP adaptors (26). Briefly, 20 ug of  
357 poly(A) selected (Invitrogen, 61012) RNA for each biological replicate from 800 heads of  
358 *w<sup>1118</sup>CS* flies was used as input to the CLIP, no antibody control, and input only (no CLIP)  
359 reactions. Fragmented RNA (Ambion, E6150S) was incubated for 2 hr at 4 °C with antibody  
360 against m<sup>6</sup>A (Abcam, ab151230), UV-crosslinked, then immunoprecipitated with magnetic  
361 beads (Invitrogen, 10004D) as in (17). Pre-adenylated dye-conjugated linkers were ligated  
362 (NEB, M0351S) to dephosphorylated 3' ends of RNA fragments overnight at 16 °C (Table S1).

363 RNA was extracted with NuPAGE SDS buffer and separated by NuPAGE gel (Invitrogen,  
364 NP0321), transferred to nitrocellulose membrane and visualized for excision at 800 nm. RNA-  
365 antibody complexes were released from the membrane by proteinase K digestion and RNA was  
366 purified with phenol-chloroform extraction. RNA was reverse transcribed (Invitrogen, 18080085),  
367 circularized (Lucigen, CL4111K), and PCR-amplified (Thermo Scientific, F530S) following the  
368 published protocol (17). Libraries were subjected to 151 bp paired-end sequencing according to  
369 the manufacturer's protocol on an Illumina NovaSeq 6000 at the University of Michigan  
370 Genomics core.

### 371 *Bioinformatics*

372 Sequencing reads were de-multiplexed using the Bcl2fastq2 Conversion Software (Illumina).  
373 Five prime end unique molecular identifiers (UMI, 9 nt random sequence) were used to remove  
374 PCR duplicates with a custom script. Then UMI and sequences and sequencing adapters were  
375 removed (fastx\_clipper, 0.0.14). Reads were mapped to the Ensembl *D. melanogaster* genome  
376 (BDGP6) genome using Star (v 2.7.5a, (27)) with default settings (Table S4). Aligned reads  
377 were peak-called using Piranha (v 1.2.1) (28) (Data S1). Metagene analysis was performed  
378 using MetaPlotR (29). Crosslink induced mutation site analysis we performed as in (17).  
379 Sequence logo was generated using weblogo (v 2.8.2, (30)). Gene ontology (GO) analysis was  
380 performed using Gene Set Enrichment Analysis (GESA) implemented in the ClusterProfiler R  
381 package version 4.2.2 (31). We used Benjamini–Hochberg to correct for multiple hypothesis  
382 testing and “biological process” from the Bioconductor package “Genome Wide Annotations for  
383 Fly” version 3.8.2 for GESA (32).

### 384 **Polysome fractionation**

385 Polysome profiles were performed as previously described (33). Briefly, 300 fly heads were  
386 homogenized using a bead beater (Bead Ruptor, 19-040E) in 800 ul polysome extraction buffer  
387 (300 mM NaCl, 50 mM Tris-HCL (pH 7.5), 10 mM MgCl<sub>2</sub>, 200 mg heparin/ml, 400 U RNasin/ml,  
388 1.0 mM, phenylmethylsulfonyl fluoride, 0.2 mg/ml cycloheximide, 1% Triton X-100, 0.1% sodium  
389 deoxycholate) then incubated on ice for 10 minutes. Lysate was cleared by centrifugation at  
390 10,000 x g for 10 min at 4 °C. Equal A260 units were layered onto a 10–50% sucrose gradient  
391 in resolving buffer (20mM Tris-HCl (pH7.5), 150mM NaCl, 15mM MgCl<sub>2</sub>, 1mM DTT, 100ug/mL  
392 cycloheximide) and separated using a Beckman SW41Ti rotor (30,000 rpm for 3 hr at 4 °C). The  
393 absorbance (254 nm) was monitored and 750 ul fractions were collected using a Brandel pump

394 set to a flow rate of 1.5mL/min. Equal molar concentrations of *Saccharomyces cerevisiae*  
395 enolase-2 (*Eno2*) transcript was added to all fractions before RNA isolation. Nucleic acid was  
396 precipitated from each fraction then pellets were resuspended in water and phenol chloroform  
397 extracted following the manufacturer's protocol (Invitrogen, 15596026). The RNA was  
398 precipitated with isopropanol and GlycoBlue. RNA was resuspended in 10 ul water and equal  
399 volumes from each fraction were reverse transcribed following the manufacture  
400 recommendations (Invitrogen, 18080085). Fractions 5-12 were probed for *dilp2* and *Eno2* by  
401 qPCR (Table S1).

#### 402 **qPCR**

403 Reverse transcription was performed using SuperScript III (Invitrogen, 18080085) with 1 ug of  
404 total RNA as input and primed with oligo(dT) (Invitrogen, 18418012) according to the  
405 manufacturer's protocol for transcript abundance analysis. Quantitative-PCR was performed  
406 following manufacturer's directions (Applied Biosystems, 4367659) for all experiments. Primers  
407 were added at a 2.5  $\mu$ M concentration in 20 ul reactions. Reactions were run on the  
408 StepOnePlus Real-Time PCR System (Applied Biosystems), and quantifications were  
409 normalized relative to the reference gene ribosomal protein 49 (*Rp49*) for transcript abundance  
410 or spike-in, *Eno2*, for polysome fractionation (delta Ct method).

#### 411 **Fat and lean mass analysis**

412 Colormetric measurements of triglycerides (Stanbio, SB-2100-430) and protein (Pierce,  
413 PI23225) were done as previously described (34), where 1 biological replicate n=2 male flies.  
414 Flies were collected 3-5 days post eclosion and homogenized with a Bead Ruptor. Standard  
415 curves were generated for each to normalize the concentration of samples. Samples were  
416 quantified using a Tecan Spark plate reader at 562 nm for protein or 500 nm for triglycerides.

#### 417 **Immunofluorescence**

418 Immunofluorescence was done essentially as (35). Male flies 3-5 days post eclosion were  
419 sorted then aged for 2-5 days on standard food. Flies were then fasted in vials with a wetted  
420 Kimwipe for 16-18 hours before dissection. Brains were dissected in PBS, fixed (4%  
421 paraformaldehyde aqueous solution in 1X PBS), blocked (10% normal goat serum, 2% Triton X-  
422 100, 1X PBS), and then incubated overnight in primary antibody (rat anti-dilp2 (1:500) (36),  
423 rabbit anti-dilp3 (1:500) (37)). After washing (3% NaCl, 1% Triton X-100, 1X PBS), brains were

424 then incubated at room temp overnight in secondary antibody: either goat anti-rat Alexa Fluor  
425 647 (Invitrogen, A-21247) or goat anti-rabbit Alexa Fluor 488 (Invitrogen, A-11008). Brains were  
426 mounted in FocusClear (CeExplorer, FC-101) on coverslips, and the cell bodies were imaged  
427 using an FV1200 Olympus confocal with a 20x objective. Median intensity of individual insulin-  
428 producing cells was quantified using Fiji (38).

#### 429 ***in vitro* transcription for direct-RNA sequencing**

430 DNA insulin templates were synthesized by IDT based on transcripts FBtr0076329 (fly *Dilp2*),  
431 NM\_001185083.2 (mouse *Ins2*), and two randomized sequences containing only one adenine  
432 (Supplemental Table 2). To generate the salmon *Ins* template, we PCR amplified (Thermo  
433 Scientific, F530S) DNA from cDNA and Sanger sequence-verified the product  
434 (XM\_014198195.2). Each template DNA sequence was used for *in vitro* transcription  
435 (Invitrogen, AM1334). To generate the randomized DNA template “rand-A” the reaction mixture  
436 contained bases adenosine, uracil, cytosine, and guanosine while the randomized DNA  
437 template “rand-m6A” used N6-methyladenosine in the place of adenosine. All the other *in vitro*  
438 transcription reactions used only the standard bases. The reactions were performed following  
439 the manufacturer's protocol overnight.

#### 440 **Direct-RNA sequencing**

441 500 ng of poly(A) selected (Invitrogen) RNA from heads of flies or a total 500 ng of pooled *in*  
442 *vitro* transcribed RNA was used for library preparation following the manufacturer's protocol  
443 (Oxford Nanopore, SQK-RNA002, Version DRS\_9080\_v2\_revB\_22Nov2018). Briefly, the RT  
444 adapter was ligated to the RNA, reverse transcription was performed, and the RNA-cDNA  
445 hybrids were purified. Next, the second adapter was ligated to the RNA and again purified. The  
446 libraries were loaded onto the MinION flowcell (R9.4.1). The Oxford Nanopore sequencer was  
447 run for 24-36 hours. Data were base called using Oxford Nanopore's Guppy (v 3.1.5) and  
448 aligned to the reference sequences using MiniMap2 -ax splice -uf -k14 (v 2.17) (39). Only reads  
449 that passed filtering and that mapped to the reference were considered for further analysis.  
450 Next, aligned reads from biological samples (modified) and matched *in vitro* transcribed RNAs  
451 (unmodified) were used as input to EpiNano (EpiNano-Error, v 1.2) to determine the positions of  
452 modifications (21). We plotted the data from the longest transcript (NM\_001185083.2) for  
453 EpiNano mouse data. The Tombo suite of tools was used to visualize reads (40).

#### 454 **Circulating glucose assay**

455 Hemolymph was collected from starved (12-16 hours) male flies from 40-50 flies per replicate by  
456 centrifugation. Circulating glucose levels were measured as previously described (41). Briefly,  
457 0.5 ul of hemolymph was added to 100 ul of HexoKinase (HK) reagent (Sigma, GAHK20),  
458 incubated at room temperature for 15 min, then absorbance at 340 nm was measured on a  
459 Tecan Spark plate reader.

#### 460 **Generation of *dilp2* m<sup>6</sup>A mutant flies**

461 CRISPR constructs were synthesized and micro-injected into *w<sup>1118</sup>* flies by Rainbow  
462 Transgenic Flies (Camarillo, CA). The pScarless donor vector (dsRed marker) was introduced  
463 to remove the endogenous Dilp2 3'UTR and replace it with a mutant Dilp2 3'UTR that replaced  
464 11 AC dinucleotides to TC (Supplement Fig. 4A). F1 progeny were screened for transformation  
465 with dsRed fluorescence. Positive transformants were Sanger sequenced (below) to verify the  
466 correct insertion.

#### 467 **Sanger Sequencing**

468 Genomic DNA was extracted from two male flies from each fly line with positive dsRed  
469 expression by silica column purification (Invitrogen, K182002). The *dilp2* locus was PCR  
470 amplified (Thermo Scientific, F-530XL), PCR products were purified and normalized to 5ng/ul  
471 with 10 pmol/ul of the with appropriate primer added. Samples were submitted to Eurofins  
472 Genomics for sequencing and traces were analyzed with Benchling software.

#### 473 **Mouse islet isolations**

474 Islet cells were collected from 4 fasted male mice from Vil-Cre backcrossed to C57 9x by the  
475 University of Michigan Islet Isolation core. The pooled tissue was added directly to Trizol  
476 (Invitrogen, 15596018) and stored at -80 °C.

#### 477 **Salmon pancreatic tissue isolation**

478 The Atlantic salmon used was approximately 2 years old and post-smolt. The pancreatic tissue  
479 from one individual was isolated from the surrounding pyloric caeca. Upon removal, the tissue  
480 was immediately added to Trizol and stored at -80 °C.

#### 481 **Supplementary Figures**

482

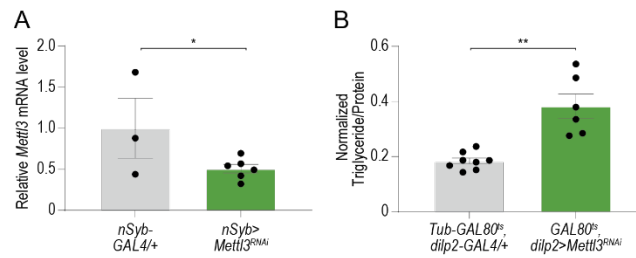

483

484 **Supplementary Fig. 1. The effects of *Mettl3* KD on energy homeostasis are not**  
485 **developmental.**

486

487 (A) Quantification of *Mettl3* mRNA from heads of control *Dilp2>w1118cs* and *Dilp2>Mettl3<sup>RNAi</sup>*  
488 flies. n=3, 5 sets of 20 flies.

489 (C) Triglyceride levels normalized to protein in male control (*Tubulin-GAL80<sup>ts</sup>, dilp2-GAL4 / +*)  
490 and *Tubulin-GAL80<sup>ts</sup>; dilp2>Mettl3<sup>RNAi</sup>* flies. n=8, 6 pools of two flies. Error bars are SEM.

491 Student's t-test. \* p < 0.05

492

493



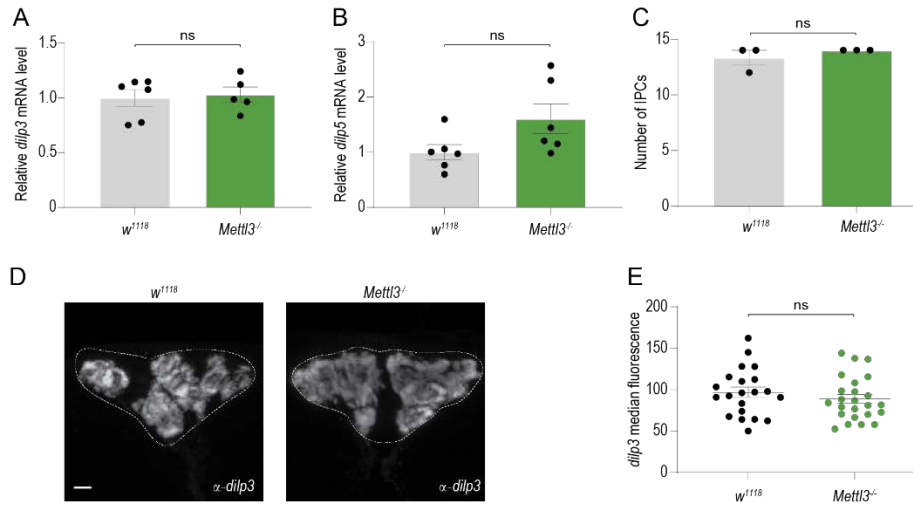

494

495 **Supplementary Fig. 2. Additional phenotyping of  $Mett13$  mutants.**

496

497 (A, B) Quantification of (A)  $dilp3$  and (B)  $dilp5$  mRNA from heads of control ( $w^{1118}CS$ ) and  
498  $Mett13^{-/-}$  mutant flies. n=6 sets of 20 flies.

499 (C) Representative confocal images of immunofluorescence of  $dilp3$  protein in control ( $w^{1118}CS$ )  
500 and  $Mett13^{-/-}$  mutant flies. Scale bar, 20um.

501 (D) Quantification of median  $dilp3$  fluorescence of individual insulin-producing cells from C), n=6  
502 per genotype. Scale bar, 20um.

503 (E) Error bars are SEM. Student's t-test. ns = not significant, \*  $p < 0.05$ .

504

505

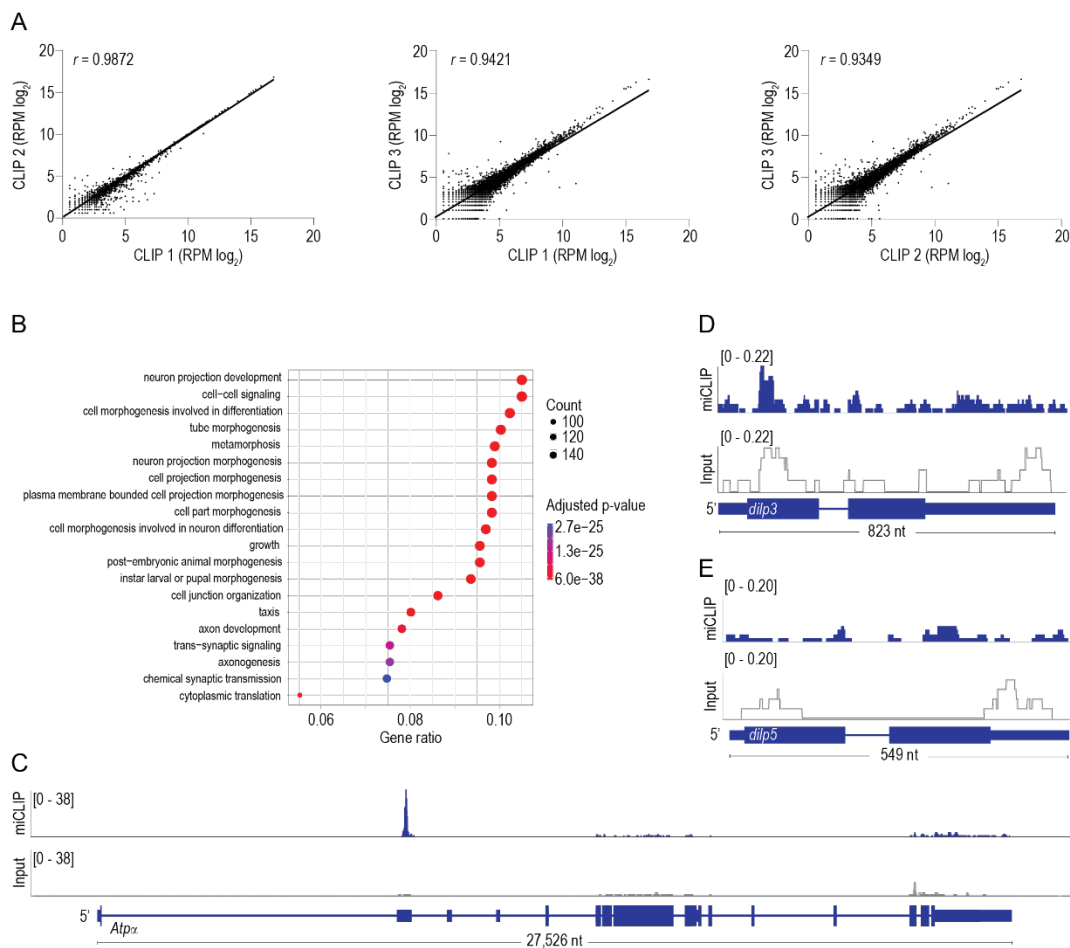

506

### 507 **Supplementary Fig. 3. Reproducibility of biological CLIP replicates.**

508

509 (A) Correlation plots of log<sub>2</sub> normalized reads per CLIP peak. Each dot represents a CLIP peak  
510 found in all three biological replicates. Pearson's correlation coefficient ( $r$ ).

511 (B) Gene ontology (GO) enrichment analysis of genes that harbor a CLIP peak. Circle size  
512 represents the number of genes that have CLIP peaks in the corresponding GO categories. The  
513 color represents the significance of the enrichment (Benjamini–Hochberg corrected p-value from  
514 Gene Set Enrichment Analysis (GSEA)).

515 (C, D, E) CLIP (blue) and input (gray) traces mapped to the *Atp $\alpha$*  (C), *dilp3* (D) and *dilp5* (E) loci  
516 (RPM).

517

518

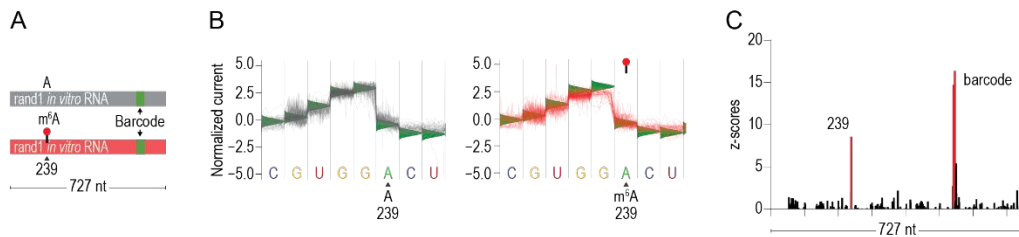

519

520 **Supplementary Fig. 4. Direct RNA sequencing of *in vitro* transcribed control RNAs.**

521

522 (A) Schematic of the randomly generated random-1 (rand1) *in vitro* transcribed RNAs. The  
523 RNAs were transcribed with A (gray) and with m<sup>6</sup>A (red). The sequences were identical except  
524 for the 6 nt molecular barcode depicted by the green block to unambiguously distinguish  
525 between the unmethylated and methylated RNA.

526 (B) Normalized direct RNA sequencing signal derived from direct RNA sequencing of *in vitro*  
527 transcribed RNA with A (gray) and with m<sup>6</sup>A (red). n=50 reads plotted. Green triangles represent  
528 the expected current level based on the base calling mode used by Guppy (Version 3.1.5,  
529 Oxford Nanopore Technologies).

530 (C) EpiNano significance trace across the *in vitro* transcribed RNA sequence. Significant  
531 position 239 (red) corresponds to the base following the methylated A (238). Other significant  
532 bases labeled “barcode” correspond to the green barcode in (A).

533

534

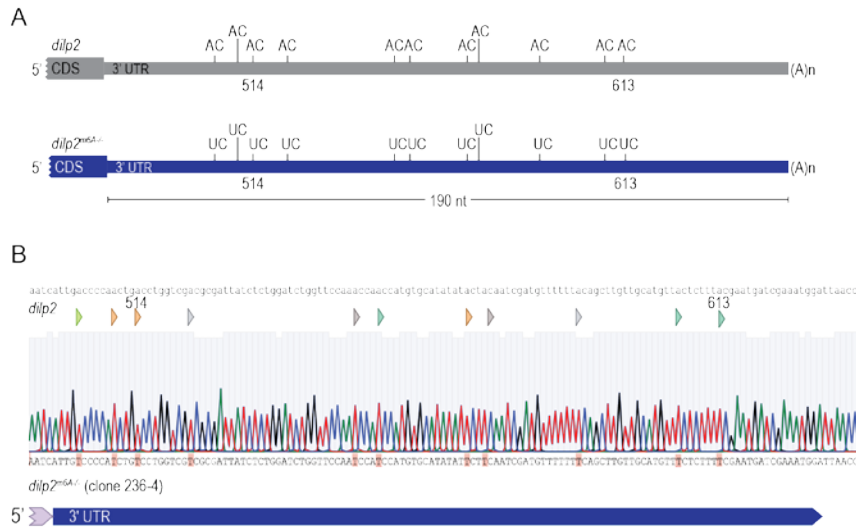

535

536 **Supplementary Fig. 5. Creation of *dilp2<sup>m6A</sup>* mutant flies.**

537

538 (A) Diagram of CRISPR strategy to replace 11 AC dinucleotides in 3' UTR of the *dilp2* transcript  
539 (*dilp2<sup>m6A/-</sup>*-gray).

540 (B) Sanger sequencing of genomic DNA from positive clone 364-4 showing all 11 AC

541 dinucleotides replaced with UC.

542

543

Wilinski et al.  
Figure S6

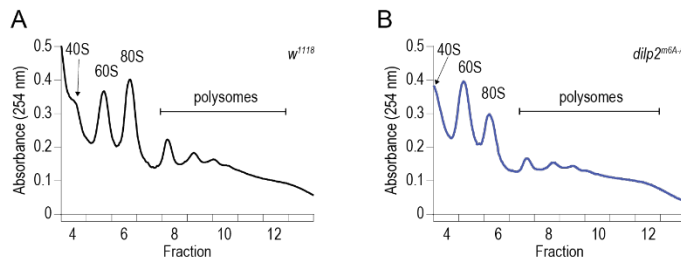

544

545 **Supplementary Fig. 6. Polysome profiles of control and *dilp2*<sup>m6A-/-</sup> mutant flies.**

546

547 (A, B) Representative polysome profile from sucrose gradient of (A) control (w<sup>1118</sup>CS) and (B)

548 *dilp2*<sup>m6A-/-</sup> mutant fly heads.

549

550

551

| Primer name                                                      | Sequence                                                                                                                                                                                                                                           |
|------------------------------------------------------------------|----------------------------------------------------------------------------------------------------------------------------------------------------------------------------------------------------------------------------------------------------|
| <b>qPCR</b>                                                      |                                                                                                                                                                                                                                                    |
| rp49                                                             | atcggttacggatcgaacaa                                                                                                                                                                                                                               |
| rp49                                                             | gacaatctccttgcgcttct                                                                                                                                                                                                                               |
| lme4 qF                                                          | AAGGAACTCGTTGAGGCTGA                                                                                                                                                                                                                               |
| lme4 qR                                                          | CACCTGTGTGGAGACAATGG                                                                                                                                                                                                                               |
| <b>Dilp2-F</b>                                                   |                                                                                                                                                                                                                                                    |
| Dilp2-F                                                          | gaatcacgggattatactcctcg                                                                                                                                                                                                                            |
| Dilp2-R                                                          | atgagcaagcctttgtccttca                                                                                                                                                                                                                             |
| Dilp3-F                                                          | AGGATCCTGCTACCTAGCCTAC                                                                                                                                                                                                                             |
| Dilp3-R                                                          | ATTGAAGTTCACGGGGTCCAAAG                                                                                                                                                                                                                            |
| Dilp5-F                                                          | AGTTCTCCTGTTCTTGATCCCG                                                                                                                                                                                                                             |
| Dilp5-R                                                          | AATCGAATAGGCCCAAGGTGC                                                                                                                                                                                                                              |
| <b>Sequencing <i>dilp2m6A</i> mutant</b>                         |                                                                                                                                                                                                                                                    |
| Dilp2-F                                                          | aggagttcgaggaggaggataac                                                                                                                                                                                                                            |
| DsRed1-N                                                         | GTA CTGGAACTGGGGGGACAG                                                                                                                                                                                                                             |
| DsRed1-C                                                         | AGCTGGACATCACCTCCCACAACG                                                                                                                                                                                                                           |
| Dilp2-R                                                          | ATCCTCCTCCTCGAACTCCTGG                                                                                                                                                                                                                             |
| <b>CLIP</b>                                                      |                                                                                                                                                                                                                                                    |
| CLIP 3' adapter                                                  | 5rApp/tggaattctcgggtgccaaggaaaaaaaaaaaaa/iAzideN/aaaaaaaaaaaaa/3Bio/                                                                                                                                                                               |
| CLIP RT primer                                                   | /5Phos/gnnnnnnnngatcgtcggactgtagaactctgaac/IdSp/gccttggcaccgagaattcca                                                                                                                                                                              |
| CLIP RNA PCR Primer (RP1)                                        | AATGATACGGCGACCACCGAGATCTACACGTTTCAGAGTTCTACAGTCCGA                                                                                                                                                                                                |
| CLIP RNA PCR Index Primers                                       | CAAGCAGAAGACGGCATAACGAGAT[ 6 bases ]GTGACTGGAGTTTCCTTGGCACCCGAGAATTCCA                                                                                                                                                                             |
| <b><i>in vitro</i> transcribed RNA for direct-RNA sequencing</b> |                                                                                                                                                                                                                                                    |
| rand-1 barcode1                                                  | TAATACGACTCACTATAGGGAGAGGCCTTCCTCTGGGGGTGTTGTTGGTGCTCCTTTCCTTTTCGTTTCGTTTCGCGCGCGGGGTGTGTGTCTGCTGGTTTTCTCCTTGCGGTGGTGGCGCCTGGTGCCCTGGTTTCTCTTGCCGTCCTGGGGTGTTCCTGCTTTGGCCGCTTGCGCTTGTCTCCTTGGTGTGTTCTGTTCGCTCCCTGGTGTCTCTTCCGGTGGCCTGGACTGTGTGCGTC |

|                 |                                                                                                                                                                                                                                                                                                                                                                                                                                                                                                                                                                                                                                                                                                                                                                                                                                                                                 |
|-----------------|---------------------------------------------------------------------------------------------------------------------------------------------------------------------------------------------------------------------------------------------------------------------------------------------------------------------------------------------------------------------------------------------------------------------------------------------------------------------------------------------------------------------------------------------------------------------------------------------------------------------------------------------------------------------------------------------------------------------------------------------------------------------------------------------------------------------------------------------------------------------------------|
|                 | <p>CCTTTTCGTGTCGGCGCGGTTGCTCCGTCCGCCCTTTGTTTGGCGCTCTT<br/> TTTCTTCCTCTTGTTTTTGGGTGCGCCTCTTTTGGCGGTTCGGCCGGTCTT<br/> GCTCGGGCTTCCCTCGGTGCGCGGGCTTCGCGCCTTTTTGGGCTTGTGTC<br/> TCTTCGTTCGTGTTCTTCGGGTCCCCTTGTGTTTCGTTCGGTCTTCTTGCC<br/> CTCGGGGCTTCGGTCTTTGCTCCTCCGTGCCTGTTGCCTTGTCTTGTGG<br/> GCCCTCGTGTCCCTTCGCGGCTGCGTTTGGGGCTTGTGTTGTCTTGTTC<br/> TTGTTTCGTCCCTGTCTGTGTGCGTTGGCCCGCGGCTTTTTGTTGTCTTTC<br/> CTGCTGTCTCTTGGTCCGTGTTTTCTTTGCTTGCCTTGTGCCGTTCGGGT<br/> TGCCTTCGCGTGTTCCTGCGTTCGTTCTTTTGGTCCGTTTTTTTCCCTCGC<br/> TCTTCCTGCGGCTTTCTTCTTTGTTGTGTCCCTctgctctgttcgggcg</p>                                                                                                                                                                                                                                                                                              |
| rand-1 barcode2 | <p>TAATACGACTCACTATAGGGAGAGGCCCTTCCCTGCGGGGTTGTTGGTGTCT<br/> CCTTTCCCTTTTCGTTCGTTTCGCGCGCGCGGGGTGTGTGTCTGCTGGTTTT<br/> CTCCTTGCGGTGGTGGCGCCTGGTGCCCTGGTTTTCTCTTGCCGTCCTG<br/> GGTGTTCCTCGCCTTGCTTTGGCCGCTTGCCTTGTCTCCTTGGTGTGTT<br/> TCTGTTGCGCTCCCTGGTGTCTCTTCCGGTGGCCTGGACTGTGTGCGTC<br/> CCTTTTCGTGTCGGCGCGGTTGCTCCGTCCGCCCTTTGTTTGGCGCTCTT<br/> TTTTCTTCCTCTTGTTTTTGGGTGCGCCTCTTTTGGCGGTTCGGCCGGTCTT<br/> GCTCGGGCTTCCCTCGGTGCGCGGGCTTCGCGCCTTTTTGGGCTTGTGTC<br/> TCTTCGTTCGTGTTCTTCGGGTCCCCTTGTGTTTCGTTCGGTCTTCTTGCC<br/> CTCGGGGCTTCGGTCTTTGCTCCTCCGTGCCTGTTGCCTTGTCTTGTGG<br/> GCCCTCGTGTCCCTTCGCGGCTGCGTTTGGGGCTTGTGTTGctGctcgtgTC<br/> TTGTTTCGTCCCTGTCTGTGTGCGTTGGCCCGCGGCTTTTTGTTGTCTTTC<br/> CTGCTGTCTCTTGGTCCGTGTTTTCTTTGCTTGCCTTGTGCCGTTCGGGT<br/> TGCCTTCGCGTGTTCCTGCGTTCGTTCTTTTGGTCCGTTTTTTTCCCTCGC<br/> TCTTCCTGCGGCTTTCTTCTTTGTTGTGTCCCTctgctctgttcgggcg</p> |
| in vitro RNA    | <p>TAATACGACTCACTATAGGGAGAGGCCCTTCCCTGCGGGGTTGTTGGTGTCT<br/> CTTTCCCTTTTCGTTCGTTTCGCGCGCGCGGGGTGTGTGTCTGCTGGTTTTCT<br/> CCTTGCGGTGGTGGCGCCTGGTGCCCTGGTTTTCTCTTGCCGTCCTG<br/> GTTTTCTCGCCTTGCTTTGGCCGCTTGCCTTGTCTCCTTGGTGTGTTTTCTG<br/> TTGCGCTCCCTGGTGTCTCTTCCGGTGGCCTGGACTGTGTGCGTCCCTTT<br/> TCGTGTTCGGCGCGGTTGCTCCGTCCGCCCTTTGTTTGGCGCTTTTTTTCTT<br/> CCTCTTGTTTTTGGGTGCGCCTCTTTTGGCGGTTCGGCCGGTCTTGTCTCGG<br/> CTTCCCTCGGTGCGCGGGCTTCGCGCCTTTTTGGGCTTGTGTCTCTTTCGTC<br/> GTGTTCTTCGGGTCCCCTTGTGTTTCGTTCGGTCTTCTTGCCCTCGGGGCT<br/> TCGGTCTTTGCTCCTCCGTGCCTGTTGCCTTGTCTTGTGGGCCCTCGTGT<br/> CCTTCGCGGCTGCGTTTGGGGCTTGTGTTGCTTTGTTCTCTTGTTCGTCCC<br/> TGTCTGTGTGCGTTGGCCCGCGGCTTTTTGTTGTCTTTGCCTGCTGTCTCTT<br/> GGTCCGTGTTTTCTTTGCTTGCCTTGTGCCGTTCGGGTTCCTTCGCGTGT<br/> TTCTGCGTTCGTTTTTTGGTCCGTTTTTTTCCCTCGCTCTTCCCTGCGGCC<br/> TTCTTCTTTGTTGTGTCCCTctgctctgttcgggcg</p>      |
| Ins2 gBlock     | <p>TAATACGACTCACTATAGGGAGAGGGGACCCAGTAACCACCAGCCCTAAGTGATC<br/> CGCTACAATCAAAAACCATCAGCAAGCAGGAAGGTTATTGTTTCAACATGGCCCT<br/> GTGGATGCGCTTCCCTGCCCTGCTGGCCCTGCTCTTCCCTCTGGGAGTCCCACCCC<br/> ACCCAGGCTTTTGTCAAGCAGCACCTTTGTGGTTCCCACCTGGTGGAGGCTCTCT<br/> ACCTGGTGTGTGGGGAGCGTGGCTTCTTCTACACACCCATGCTCCCGGCTGAAGT<br/> GGAGGACCCACAAGTGGCACAACCTGGAGCTGGGTGGAGGCCCGGGAGCAGGTGAC<br/> CTTCAGACCTTGGCACTGGAGGTGGCCAGCAGAAGCGTGGCATTGTAGATCAGT<br/> GCTGCACCAGCATCTGCTCCCTCTACCAGCTGGAGAACTACTGCAACTAGACCCA<br/> CCACTACCCAGCCTACCCCTCTGCAATGAATAAAAACCTTTGAATGAGCACAAAAA<br/> Aaaa</p>                                                                                                                                                                                                                                                                                              |
| F Ins Ssalar-1  | <p>ACAAACATGCCTAACGAGGC</p>                                                                                                                                                                                                                                                                                                                                                                                                                                                                                                                                                                                                                                                                                                                                                                                                                                                     |

|                                |                                            |  |  |
|--------------------------------|--------------------------------------------|--|--|
| F Ins Ssalar-1 + T7            | TAATACGACTCACTATAGGGAGAACAACATGCCTAACGAGGC |  |  |
|                                |                                            |  |  |
| All primers are shown 5' to 3' |                                            |  |  |

552

553 **Table S1. Oligonucleotide sequences.**

554

555 DNA sequences used for qPCR primers, Sanger sequencing, CLIP adaptors, and in vitro

556 transcription of control RNAs.

557



558

|                                                          | Lower case letter corresponds to position |
|----------------------------------------------------------|-------------------------------------------|
| <b><i>in vitro</i> transcribed randomized sequence-1</b> |                                           |
| Position                                                 | sequence context                          |
| 239                                                      | GGUGGCCUGGaCUGUGUGCGU                     |
| <b><i>Drosophila melanogaster</i> (fly)</b>              |                                           |
| Position                                                 | sequence context                          |
| 519                                                      | AACUGACCUGgUCGACGCGAU                     |
| 614                                                      | UUACUCUUUAcGAAUGAUCGA                     |
| 644                                                      | CUUUGGCAAAcAAUCGC                         |
| <b><i>Salmo salar</i> (Atlantic salmon)</b>              |                                           |
| Position                                                 | sequence context                          |
| 381                                                      | GCAGUGCUGUcACAAGCCCUG                     |
| 464                                                      | CUCUCUGCCAcUCUCCAAUGC                     |
| 495,496                                                  | CACCCCCGUCUaAAAGAUCUGC                    |
| 549                                                      | UUUUAUUUUUcCUAGAAAAAU                     |
| <b><i>Mus musculus</i> (mouse)</b>                       |                                           |
| Position                                                 | sequence context                          |
| 34                                                       | UAAGUGAUCCgCUACAAUCAA                     |
| 531                                                      | AACUAGACCCaCCACUACCCA                     |
| 581                                                      | UGAAUGAGCAcAAAAAA                         |

559

560 **Table S2. Sequence context of significant direct-RNA sequence differences.**

561

562 Sequences are listed for random *in vitro* transcribed RNA, and regions from native transcripts  
 563 from each organism tested.

564

| Fly line                                                                                 | Reference                | Notes                              |
|------------------------------------------------------------------------------------------|--------------------------|------------------------------------|
| Drosophila, w[1118]CS                                                                    | A. Simon                 | CS and w1118cs from Seymour Benzer |
| Drosophila, w[1118]                                                                      | Rainbow Transgenic Flies |                                    |
| Drosophila, lme4null (Mettl3)                                                            | Jean-Yves Roignant       | backcrossed to w1118cs x 6         |
| Drosophila, UAS-lme4-HA/Cyo                                                              | Jean-Yves Roignant       |                                    |
| Drosophila, UAS-Mettl3RNAi: y[1] v[1]; P{y[+t7.7] v[+t1.8]=TRiP.GL01126}attP2/TM3, Sb[1] | Bloomington              | 41590                              |
| Drosophila, Dilp2-GAL4: w[*]; P{w[+mC]=llp2-GAL4.R}2/Cyo                                 | Bloomington              | 37516                              |
| Drosophila, nSyb-GAL4-2.1                                                                | Julie Simpson            |                                    |
| Drosophila, Tubulin-GAL80, dilp2-GAL4: w[*]; Dilp2R-Gal4, TubP-Gal80[ts]/Cyo; +          | Bloomington              |                                    |
| Drosophila <i>dilp2m6A</i> : w[1118];; Dilp2[m6A]/TM6C                                   | This study               |                                    |

565

566 **Table S3. Fly stocks.**

567

568

569

570 **Table S4. Summary of sequencing reads.**

571

572 **Data S1. List of CLIP peaks.**

573

574 Complete list of peaks from each biological replicate and the union of the data sets. CIMS

575 output of C to T transitions.

576

577

578 **Figure Legends**

Wilinski et al.  
Figure 1

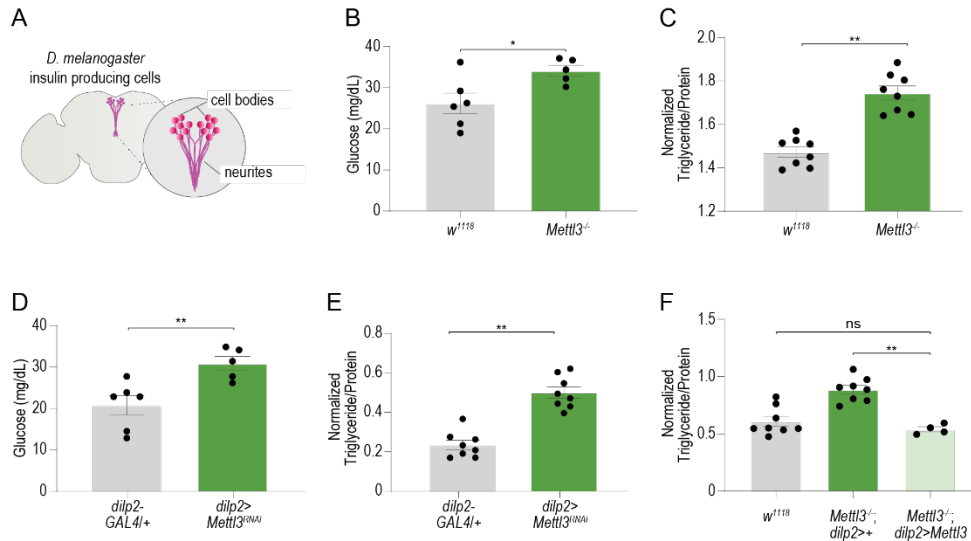

579

580 **Fig. 1. Mettl3 is required for glucose balance and energy homeostasis in the insulin-**  
581 **producing cells.**

582 (A) Diagram showing the location and anatomy of insulin-producing cells in the fly brain.

583 (B) The circulating hemolymph glycemia (n=6,) of fasted *Mettl3<sup>-/-</sup>* and *w<sup>1118</sup>* control flies.

584 (C) Triglyceride levels normalized to protein in male *w<sup>1118</sup>*CS and mutant *Mettl3<sup>-/-</sup>* flies. n=8 pools  
585 of two flies.

586 (D) The hemolymph glycemia (n=6) of starved *dilp2>Mettl3<sup>RNAi</sup>* and transgenic control flies.

587 (E, F) Triglyceride levels normalized to protein in male flies with cell-specific (E) knockdown

588 (*dilp2>Mettl3<sup>RNAi</sup>*) or rescue of (F) (*dilp2>Mettl3<sup>-/-</sup>*) of *Mettl3*; n=4-8 pools of two flies. Student's t-

589 test. Error bars represent standard error of the mean (SEM). \*p<0.05, \*\* p<0.005.

590

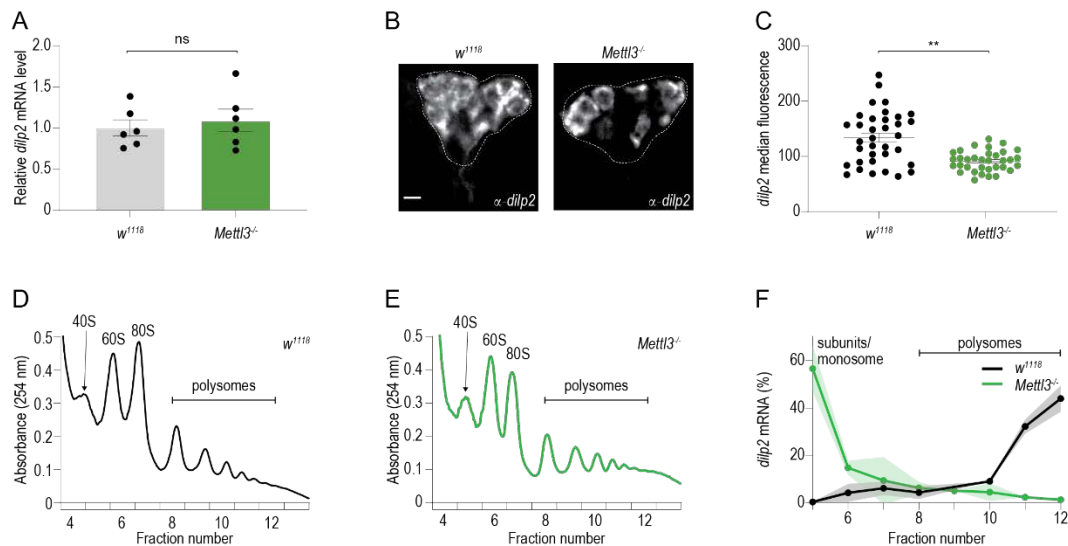

591

592 **Fig. 2. Mettl3 is required for the translation of *dilp2* mRNA**

593 (A) Quantification of *dilp2* mRNA from control and *Mettl3<sup>-/-</sup>* mutant flies. n=6 sets of 20 flies.  
594 Error bars SEM in this and all subsequent panels. Student's t-test. ns =not significant  
595 (p=0.5944).

596 (C) Representative confocal images of immunofluorescence of *dilp2* protein in control (*w<sup>1118</sup>*CS)  
597 and *Mettl3<sup>-/-</sup>* mutant flies. Scale bar, 20um.

598 (D) Quantification of median dilp2 fluorescence (arbitrary units) of individual insulin-producing  
599 cells from *Mettl3* mutants and control flies; n=15 brains. Male flies were starved for 16 hr prior to  
600 dissection and collected in 3 independent sets. Student's t-test. \*\* p < 0.005.

601 (E-F) Representative polysome profile from sucrose gradient of (E) control (*w<sup>1118</sup>*CS) and (F)  
602 *Mettl3<sup>-/-</sup>* mutant fly heads (400).

603 (G) The proportion of *dilp2* mRNA in sucrose gradient fractions 5-12 normalized to spike-in RNA  
604 from control (*w<sup>1118</sup>*CS) and *Mettl3<sup>-/-</sup>* mutant flies. n=2, 400 heads per sample.

605

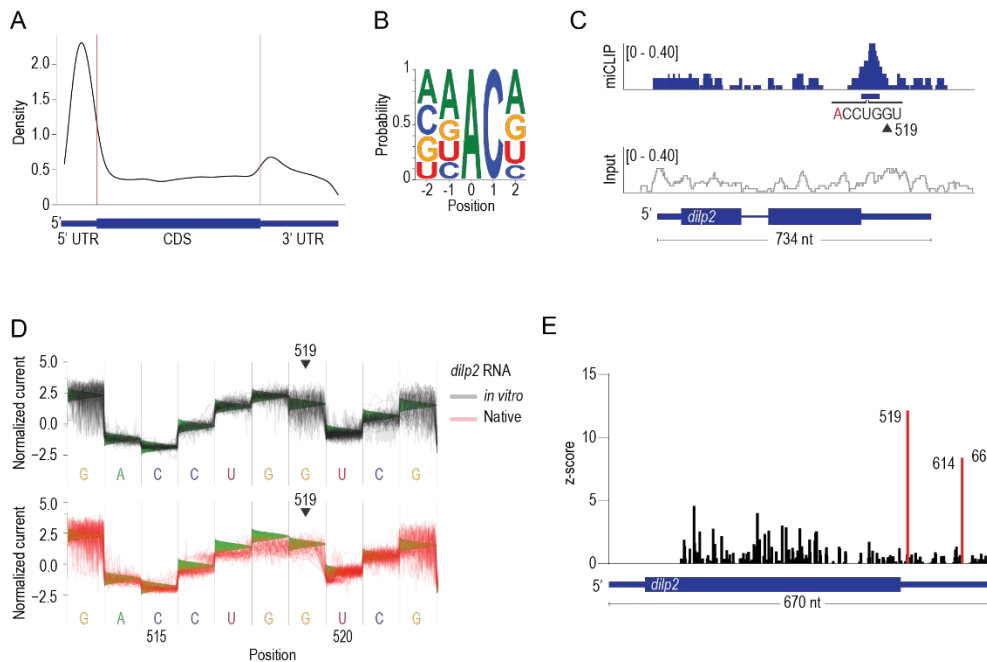

606

607 **Fig. 3. The 3' UTR of the *Drosophila melanogaster dilp2* mRNA is methylated.**

608 (A) Metagenome plot of CLIP peaks from *D. melanogaster* head mRNA. Representing the position  
609 of 4,506 CLIP peaks.

610 (B) The sequence context of 5,485 CIMS contained within CLIP peaks.

611 (C) CLIP (top, blue) and the no IP input control (bottom, grey) traces mapped to the *dilp2* locus  
612 (Reads Per Million mapped reads, RPM). The blue horizontal bar indicates the CLIP peak (FDR  
613 <0.05) and the base composition flanking a putative m<sup>6</sup>A site near position 519.

614 (D) Normalized direct-RNA sequencing signal derived from *in vitro* transcribed *dilp2* RNA (top,  
615 gray, n=50 reads) and native *dilp2* mRNA from fly heads (bottom, red n = 50 reads) of the  
616 region corresponding to the CLIP peak in (C). Green triangles represent the expected current  
617 level based on the base calling model (see methods).

618 (E) EpiNano significance trace showing the nucleotide positions that are significantly different  
619 (red bar, z-score > 6) between native and *in vitro* transcribed *dilp2* RNAs.

620

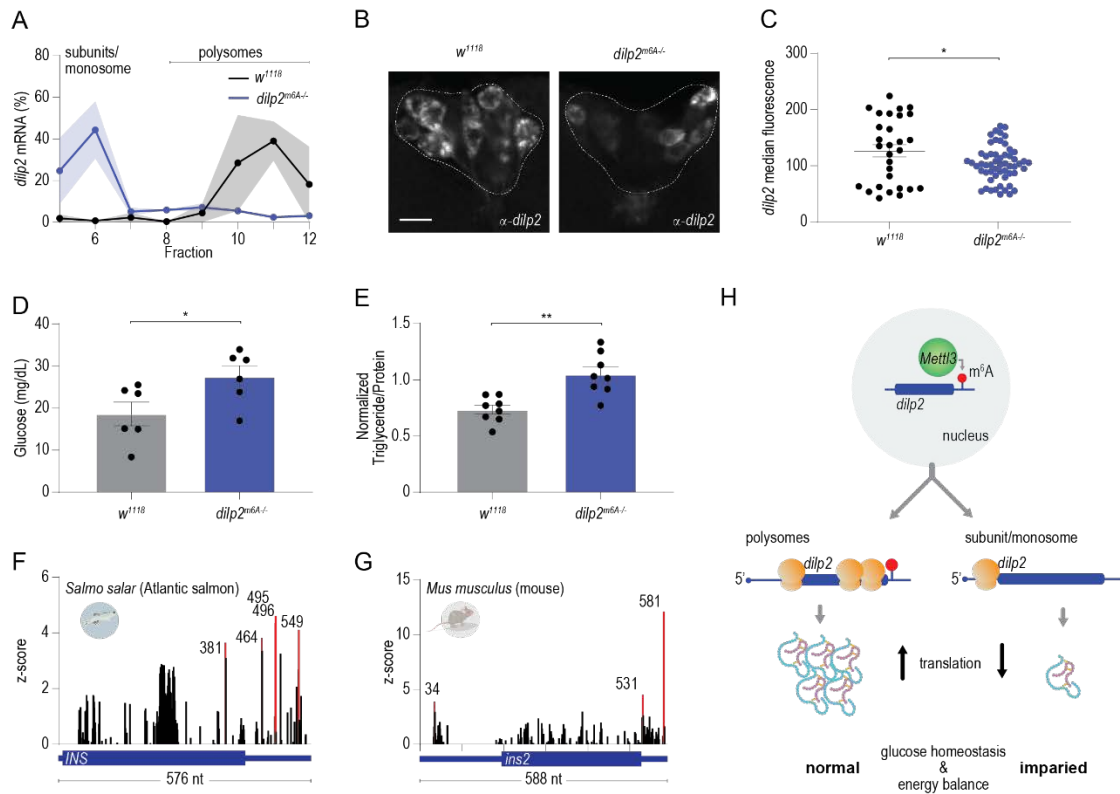

621

622 **Fig. 4. Methylation of dilp2 mRNA is necessary for robust translation.**

623 (A) Proportion of *dilp2* mRNA found in polysome gradient fractions 5-12 compared to a spike-in  
624 RNA. n=3 samples of 400 heads each. Shading represents SEM.

625 (B) Representative confocal images of *dilp2* protein in fasted control and *dilp2*<sup>m6A-/-</sup> mutant flies.

626 (C) Quantification of median *dilp2* fluorescence of individual insulin-producing cells from 6  
627 brains from B). Scale bar, 20um. Error bars SEM. \* p<0.01 Student's t-test.

628 (D) The circulating hemolymph glycemia (n=6) of fasted *dilp2*<sup>m6A-/-</sup> and control flies.

629 (E) Triglyceride levels normalized to protein in control (*w*<sup>1118</sup>) and mutant *dilp2*<sup>m6A-/-</sup> flies. n=8  
630 pools of two flies.

631 (F, G) Direct RNA sequencing significance trace comparing *in vitro* transcribed salmon INS (F)

632 or mouse INS2 (G) RNA to native mRNA isolated from salmon pancreatic tissue (F) or mouse

633 pancreatic islets (G). Numbers represent the significantly different nucleotides (red bar, z-scores  
634 > 4 or >5) between native and *in vitro* transcribed RNAs.

635 (H) Model of translational control of *dilp2* RNA via m<sup>6</sup>A. \*p < 0.05, \*\* p < 0.005.
